# Supplementary material for: Measuring Long-Term Impact Based on Network Centrality: Unraveling Cinematic Citations
Source: PubMed Central journal article supplement (PMC4189979; doi:10.1371/journal.pone.0108857), 2014-10-08
Supplement: pone.0108857.s004.pdf [file pone.0108857.s004.pdf]

| <i>Format: Text files</i>           |                                                                                                                                                       |                                                                                           |
|-------------------------------------|-------------------------------------------------------------------------------------------------------------------------------------------------------|-------------------------------------------------------------------------------------------|
| Data                                | Source Name                                                                                                                                           | File Name                                                                                 |
| Citation information                | IMDb                                                                                                                                                  | movie-links.list.gz                                                                       |
| Average film rating                 | IMDb                                                                                                                                                  | ratings.list.gz                                                                           |
| Actors and Actresses                | IMDb                                                                                                                                                  | actors.list.gz & actresses.list.gz                                                        |
| Film genres                         | IMDb                                                                                                                                                  | genres.list.gz                                                                            |
| Directors                           | IMDb                                                                                                                                                  | directors.list.gz                                                                         |
| Writers                             | IMDb                                                                                                                                                  | writers.list.gz                                                                           |
| Composers                           | IMDb                                                                                                                                                  | composers.list.gz                                                                         |
| <i>Format: Scraped HTML files</i>   |                                                                                                                                                       |                                                                                           |
| Data                                | Description                                                                                                                                           | URL                                                                                       |
| Award wins and nominations          | Awards page of the individual films on IMDb                                                                                                           | e.g. for the film Wings (1927)<br>http://www.imdb.com/title/tt0018578/awards?ref_=tt_ql_4 |
| List of the American Film Institute | Based on more than 1,500 members of the film community who picked the 100 best films of all time from a list of 400 movies nominated by the institute | http://www.infoplease.com/ipea/A0760906.html#ixzz2UV18M8fP                                |
| List of the British Film Institute  | Based on the votes of 846 critics, programmers, academics and distributors                                                                            | http://www.bfi.org.uk/news/50-greatest-films-all-time                                     |
| List of Roger Ebert                 | Ebert compiled "best of the year" movie lists beginning in 1967                                                                                       | http://www.buzzfeed.com/elliievhall/roger-eberts-top-films-of-his-career                  |
| List of Tim Dirks                   | Written and edited by Tim Dirks on filmsite.org                                                                                                       | http://www.filmsite.org/momentsindx.html#100greats                                        |
| IMDb Top 100                        | The first 100 entries from the IMDb Top 250 as voted by regular users                                                                                 | http://www.imdb.com/chart/top                                                             |
| List of IMDb User 1                 | Personal top movies list by <i>Dennis van Straalen</i> created 11 July 2011                                                                           | http://www.imdb.com/list/ls005513983/                                                     |
| List of IMDb User 2                 | Movies 2 Watch by <i>bwalt22</i> created 31 May 2013                                                                                                  | http://www.imdb.com/list/ls053771856/                                                     |
| List of IMDb User 3                 | Phenomenal films by <i>meghanmarvell94</i> created 31 May 2013                                                                                        | http://www.imdb.com/list/ls053777147/                                                     |
| List of IMDb User 4                 | Personal Favourites by <i>WillBP</i> created 4 February 2012                                                                                          | http://www.imdb.com/list/ls002700805/                                                     |

**Supplementary Table S1:** Overview of the used data sets and their sources. All data is freely available. The URLs were last accessed on 2014 Sep 8.
